# Supplementary material
Source: PubMed Central journal article supplement (PMC4426160)
Supplement: NIHMS683977-supplement-Supplemental_data.pdf [file NIHMS683977-supplement-Supplemental_data.pdf]

# **Proteomics Clinical Applications**

**Supporting Information  
for Proteomics**

**DOI 10.1002/prca.201400028**

Fábio Trindade, Frank G. Oppenheim, Eva J. Helmerhorst, Francisco Amado,  
Pedro S. Gomes and Rui Vitorino

**Uncovering the molecular networks in periodontitis**

**Supplemental Table 1.** Genomics, Transcriptomics, Proteomics, Peptidomics and Metabolomics contribution for periodontitis diagnosis.

“+” and “-” symbols represent over- and underexpression, respectively.

| Methodological Approach | Purpose                                                                                                                                                                                                     | Sample                                                                                                                      | Findings                                                                                                                                                                                                                                                                                                                                              | Ref. |
|-------------------------|-------------------------------------------------------------------------------------------------------------------------------------------------------------------------------------------------------------|-----------------------------------------------------------------------------------------------------------------------------|-------------------------------------------------------------------------------------------------------------------------------------------------------------------------------------------------------------------------------------------------------------------------------------------------------------------------------------------------------|------|
| <b>Genomics</b>         |                                                                                                                                                                                                             |                                                                                                                             |                                                                                                                                                                                                                                                                                                                                                       |      |
| PCR-RFLP                | Investigation of cytokines genotypes to relate with periodontitis severity, including screening of 5 different gene positions: IL-1A (-889), IL-1B (-511), IL-1B (+3953), IL-1RN (intron 2) and TNFA (-308) | Blood from patients with mild or no periodontitis (n = 49), moderate (n = 42) and generalized severe periodontitis (n = 43) | In non-smokers patients, the occurrence of the combined genotype IL-1A (-889, allele 2) and IL-1B (+3953, allele 2) identified severe periodontitis                                                                                                                                                                                                   | (37) |
| PCR-RFLP                | Studying the association between IL-1B (+ 3954C/T) gene polymorphism and different clinical presentations of periodontitis in South Indian population                                                       | Oral epithelial cells from healthy subjects (n = 30), AP subjects (n = 30) and CP subjects (n = 30)                         | CP patients displayed statistically different (p < 0.05) percentages of T alleles (38%) when compared to control patients (19%) in the locus +3954 of IL-1B gene. Thus, IL-1B (+ 3954) polymorphism could be a risk factor for CP in this population                                                                                                  | (35) |
| GWAS                    | Identifying possible <i>loci</i> associated with CP (screening of > 17 million SNPs and short insertions and deletions) in West Pomerania (Germany) population                                              | 4032 individuals from two cross-sectional independent studies: SHIP (n = 3365) and SHIP-TREND (n = 667)                     | None of the SNPs studied was significantly associated with CP                                                                                                                                                                                                                                                                                         | (46) |
| PCR-RFLP                | Studying the association between four TNF- $\alpha$ gene polymorphisms (-1031T/C, -857C/T, -308G/A and -238G/A) and AP and CP in Chinese population                                                         | Blood from healthy subjects (n = 180), subjects with CP (n = 180) and subjects with AP (n = 180)                            | Two genotypes were associated with periodontitis in Chinese population<br>TNF- $\alpha$ (-1031CC) genotype frequency was significantly higher (p < 0.05) in subjects with CP when compared to the healthy ones<br>TNF- $\alpha$ (-308AA) genotype frequency was significantly higher (p < 0.05) in subjects with AP when compared to the healthy ones | (34) |

|                                                           |                                                                                                                                                                                                          |                                                                                                                    |                                                                                                                                                                                                                                                                                                                                                                                                 |      |
|-----------------------------------------------------------|----------------------------------------------------------------------------------------------------------------------------------------------------------------------------------------------------------|--------------------------------------------------------------------------------------------------------------------|-------------------------------------------------------------------------------------------------------------------------------------------------------------------------------------------------------------------------------------------------------------------------------------------------------------------------------------------------------------------------------------------------|------|
| TaqMan® PCR system                                        | Analysis of genomic markers (SNPs) for severe periodontitis in Japanese population                                                                                                                       | Blood from healthy volunteers (n = 19) and from severe periodontitis patients (n = 22)                             | SNPs in GNRH1, PIK3R1, DPP4, FGL2 and CALCR can be genomic markers for severe periodontitis, once they were significantly different ( $p < 0.01$ ) between healthy and diseased subjects                                                                                                                                                                                                        | (43) |
| PCR-RFLP                                                  | Studying the association of 2 SNPs in COX-2 gene (-1195G/A and +8473C/T) with CP in North Indians                                                                                                        | Blood from healthy subjects (n = 60) and from subjects with CP (n = 56)                                            | Individual mutants SNPs differences were not statistically different ( $p > 0.05$ ), though haplotype AT (-1195A/+8473T) was significantly associated with increased risk for CP ( $p = 0.0370$ )                                                                                                                                                                                               | (29) |
| Tetra-Primer Amplification Refractory Mutation System-PCR | Investigation of the association between 2 SNPs (-1087G/A and -597C/A) in IL-10 gene promoter and GCP and LAP in Jordanian population                                                                    | Blood from control subjects (n = 86), subjects with CP (n = 105) and subjects with AP (n = 85)                     | -1087GA and -1087AA genotypes frequencies were significantly higher ( $p < 0.001$ ) in subjects with CP when compared to the healthy ones<br>-597CA and -597AA genotypes frequencies were significantly higher ( $p = 0.021$ ) in subjects with CP when compared to the healthy ones<br>There were not observed significant differences in allele distribution between controls and AP patients | (30) |
| TaqMan® Allelic Discrimination Assays PCR-RFLP            | Studying SNPs in pattern recognition receptors genes including TLR2 (G2408A), TLR4 (A896G), TLR9 (T1486C), TLR9 (T1237C) and CD14 (C260T) in periodontally healthy patients and CP patients (Caucasians) | Blood from healthy subjects (n = 77) and from patients with CP (n = 114)                                           | CC, CT and TT genotypes of CD14 (C260T) were statistically different between the groups ( $p = 0.04$ ), being CC genotype more frequent in subjects with CP<br>CC homozygosity increases 2.49-fold the risk of disease ( $p = 0.04$ )<br>No more significant genotype differences were found between the two Caucasian groups                                                                   | (31) |
| Meta-analysis based on 11 case-control studies            | Investigation of MMP-1 1G-to-2G polymorphism and its association to periodontal disease                                                                                                                  | Genomic DNA from diseased subjects (n = 1447) and healthy subjects (n = 1710)<br>Details of the 11 studies unknown | MMP-1 -1607 2G/2G genotype showed an increased risk for periodontitis when compared to MMP-1-1607 1G/1G genotype (1.45-fold risk; $p = 0.04$ )                                                                                                                                                                                                                                                  | (44) |

|                        |                                                                                                                                                                   |                                                                                                                              |                                                                                                                                                                                                                                                                                                                                                                                                                                             |      |
|------------------------|-------------------------------------------------------------------------------------------------------------------------------------------------------------------|------------------------------------------------------------------------------------------------------------------------------|---------------------------------------------------------------------------------------------------------------------------------------------------------------------------------------------------------------------------------------------------------------------------------------------------------------------------------------------------------------------------------------------------------------------------------------------|------|
| PCR-based and PCR-RFLP | Exploring the association between NOS3 gene polymorphisms (+894 G/T and intron 4 VNTR) and different forms of periodontal disease in Turkish population           | Blood collected from healthy volunteers (n = 50), subjects with gingivitis (n = 31) or with AP (n = 23) or with CP (n = 26)  | In CP group, NOS3 +894TT genotype was significantly increased (p < 0.05). Besides, there was a significant association between PD and CAL with GG genotype (p = 0.001) in CP group and with GT and TT genotype (p < 0.02) in AP group<br>VNTR polymorphisms did not shown any significant association with PD or CAL                                                                                                                        | (32) |
| PCR-SSPs               | Exploring the association of 3 PECAM-1 gene polymorphisms (Ser563Asn, Leu125Val and Arg670Gly) and periodontitis                                                  | Blood from healthy subjects (n = 101), from patients with AP (n = 53) and with CP (n = 52)                                   | The only statistically significant difference was found when comparing Ser653 homozygous and Asn563 homozygous genotypes from control and diseased subjects (the first more frequent in controls, p = 0.02, and the latter more frequent in periodontitis-affected individuals, p = 0.02)<br>There was no significant differences found both in allele and genotype frequencies among the different clinical presentations of periodontitis | (33) |
| PCR-RFLP               | Investigation of the association between TLR genes polymorphisms (TLR-2 +2408G/A and -16934A/T; TLR-9 -1486C/T, -1237C/T and +2848A/G) and CP in Czech population | Blood from healthy subjects (n = 259) and from patients with CP (n = 222)                                                    | There was not found any significant association of the studied polymorphisms with CP, though -1486T/-1237T/+2848A haplotype combination of TLR9 gene was significantly more frequent in periodontitis patients than in controls (p < 0.00001) and -1486T/-1237T/+2848G haplotype combination was significantly less frequent in periodontitis patients than in controls (p = 0.05)                                                          | (27) |
| GWAS                   | Identifying genetic risk factors for AP in German Population                                                                                                      | 1255 subjects in 2 stages: GWAS1: GAP subjects (n = 141) and controls (n = 500); GWAS2: LAP (n = 142) and controls (n = 472) | Only GLT6D1 gene showed a significant association with GAP in GWAS1 (1.67-fold risk; p = 1.8 x 10 <sup>-4</sup> ) and with LAP in GWAS2 (1.65-fold risk; p = 3.1 x 10 <sup>-4</sup> )                                                                                                                                                                                                                                                       | (45) |

|                                   |                                                                                                                                                  |                                                                                                                                                                                   |                                                                                                                                                                                                                                                                                                                                                             |      |
|-----------------------------------|--------------------------------------------------------------------------------------------------------------------------------------------------|-----------------------------------------------------------------------------------------------------------------------------------------------------------------------------------|-------------------------------------------------------------------------------------------------------------------------------------------------------------------------------------------------------------------------------------------------------------------------------------------------------------------------------------------------------------|------|
| 16S rRNA genes 454 pyrosequencing | Comparing subgingival bacterial communities between healthy subjects and subjects with CP                                                        | Subgingival plaques from healthy controls (n = 29) and from subjects with CP (n = 29)                                                                                             | 123 species were identified in disease, and 53 in health <i>Spirochaetes</i> , <i>Synergistetes</i> , <i>Bacteroidetes</i> , <i>Clostridia</i> , <i>Negativicutes</i> and <i>Erysipelotrichia</i> were disease-associated and <i>Proteobacteria</i> and the class <i>Bacilli</i> were health-associated                                                     | (80) |
| 16S rRNA microarrays              | Characterize subgingival microbiota in African-American children with LAP                                                                        | Subgingival plaques from healthy and diseased sites of children with LAP (n = 31), from healthy sites from healthy siblings (n = 11) and from healthy sites from controls (n = 9) | <i>Aggregatibacter actinomycetemcomitans</i> and <i>Filifactor alocis</i> were more prevalent in diseased sites in LAP (p < 0.03)<br><i>Aggregatibacter actinomycetemcomitans</i> , <i>Filifactor alocis</i> , <i>Tannerella sp.</i> , <i>Solobacterium moorei</i> , <i>Parvimonas micra</i> , <i>Capnocytophaga sp.</i> were more common in LAP (p < 0.01) | (79) |
| <b>Transcriptomics</b>            |                                                                                                                                                  |                                                                                                                                                                                   |                                                                                                                                                                                                                                                                                                                                                             |      |
| qRT-PCR                           | Comparing S100A2 mRNA expression between healthy subjects, and subjects with chronic gingivitis, moderate periodontitis and severe periodontitis | Gingival tissues from healthy subjects (n = 14), patients with chronic gingivitis (n = 13), with moderate (n = 48) and severe periodontitis (n = 27)                              | Subjects with moderate or severe periodontitis displayed significantly higher levels of S100A2 mRNA, S100A8 mRNA and S100A9 mRNA (p < 0.05) than healthy subjects                                                                                                                                                                                           | (36) |
| qRT-PCR                           | Comparing the expression of TLR5, TLR7, TLR9, TLR2, TLR4, IFN- $\alpha$ 1 mRNA between gingivitis and periodontitis                              | Gingival tissues collected from patients with gingivitis (n = 27) and from patients with moderate to advanced CP (n = 59)                                                         | TLR2, TLR4, TLR7 and TLR9 transcripts were significantly higher in periodontitis patients than in gingivitis patients (p < 0.01)<br>IFN- $\alpha$ 1 transcript was also significantly higher in periodontitis patients than in gingivitis patients (p = 0.033)                                                                                              | (28) |

|                                                                    |                                                                                                           |                                                                                                                        |                                                                                                                                                                                                                                                                                                                                                                                                                                                                             |      |
|--------------------------------------------------------------------|-----------------------------------------------------------------------------------------------------------|------------------------------------------------------------------------------------------------------------------------|-----------------------------------------------------------------------------------------------------------------------------------------------------------------------------------------------------------------------------------------------------------------------------------------------------------------------------------------------------------------------------------------------------------------------------------------------------------------------------|------|
| cDNA synthesis (RNA reverse transcription) and Human Genome Arrays | Gene expression profiling in healthy and diseased gingival tissues                                        | Gingival tissue samples from healthy sites (n = 64) and from diseased sites (n = 183) from patients with periodontitis | 12744 probe sets were differentially expressed among healthy and diseased tissue samples ( $p < 9.15 \times 10^{-7}$ ), 5295 of those were up-regulated and 7449 were down-regulated<br>Further gene ontology analysis revealed 61 gene groups differentially expressed ( $p < 0.05$ ), including apoptosis, antimicrobial humoral response, antigen presentation, regulation of metabolism, signal transduction and angiogenesis                                           | (41) |
| Gene expression microarray Cluster analysis                        | Contrasting gene expression profiles of neutrophils between patients with CP and matched healthy subjects | PMN isolated from blood and oral rinse obtained from healthy subjects (n = 4) and from patients with GCP (n = 4)       | In healthy subjects, 588 genes were differentially expressed between blood PMN and oral PMN ( $p < 0.05$ ), while in ill subjects, 3593 genes were differentially expressed between blood PMN and oral PMN ( $p < 0.05$ )<br>Healthy subjects showed up-regulation of several signaling pathways: NOD-like receptor, cell adhesion molecules and IL-17, while ill subjects showed up-regulation of other signaling pathways: TLR, caspase cascade, apoptosis ( $p < 0.05$ ) | (42) |
| RNA sequencing Cluster analysis                                    | Gene expression profiling to compare healthy and diseased gingival sites in the same patient              | Gingival tissues samples from healthy and periodontitis-affected sites in patients with periodontitis (n = 10)         | 453 differently expressed genes ( $p < 0.01$ ), were observed in periodontitis-affected gingiva, with 381 up-regulated and 72 down-regulated genes<br>Immune and inflammatory responsive genes displayed the most distinct pattern ( $p < 0.05$ )<br>Transcripts of inflammatory mediators (IL-1 $\beta$ , IL-6, IL-8, TNF- $\alpha$ , RANTES and MCP-1) were highly expressed in periodontitis-affected gingiva                                                            | (40) |

|                                                   |                                                                                                                  |                                                                                                            |                                                                                                                                                                                                                                                                                                                                                                                                     |             |
|---------------------------------------------------|------------------------------------------------------------------------------------------------------------------|------------------------------------------------------------------------------------------------------------|-----------------------------------------------------------------------------------------------------------------------------------------------------------------------------------------------------------------------------------------------------------------------------------------------------------------------------------------------------------------------------------------------------|-------------|
| Microarrays<br>qRT-PCR                            | Identifying specific gene expression profiles and biological pathways in periodontitis-affected gingival tissues | Gingival tissue samples from healthy and periodontitis-affected sites in patients with severe CP (n = 3)   | In periodontitis-affected gingival tissues, 28 genes were differently expressed in contrast to healthy tissues. From those, 15 were up-regulated and 13 were down-regulated (> 2-fold, p < 0.05)<br>Pathway analysis revealed 15 up-regulated pathways (including leukocyte transendothelial migration) and 5 down-regulated pathways (including cell communication) in affected tissues (p < 0.05) | (39)        |
| <b>Proteomics</b>                                 |                                                                                                                  |                                                                                                            |                                                                                                                                                                                                                                                                                                                                                                                                     |             |
| Label-free<br>MS/MS                               | nanoUPLC-<br>Screening proteome differences between healthy subjects and patients with CP                        | SWS from healthy subjects (n = 20) and diseased patients (n = 20)                                          | 20 differently expressed proteins (> 1.5-fold; p < 0.05)<br>Plastin-2, profilin-1, neutrophil collagenase, $\alpha$ -2-macroglobulin, complement C3, lactotransferrin and MMP-9 confirmed as potential markers                                                                                                                                                                                      | + (53)      |
| nanoLC-ESI-MS/MS<br>SDS-PAGE-nanoLC-ESI-<br>MS/MS | Collecting full GCF proteome from periodontally healthy subjects                                                 | GCF from healthy subjects (n = 9)                                                                          | 199 identified proteins (p < 0.1) with several sets of macromolecules more specific to GCF than to serum: early inflammation, immune response, proteins involved in defending from and killing bacteria, proteinases, modulators of cytokines and extracellular matrix constituents                                                                                                                 | (54)        |
| Enzymatic assays<br>Zymography                    | Studying enzymatic activities and specificity of WS proteases in periodontal health and disease                  | SWS supernatant from healthy subjects (n = 23) and patients with moderate to severe periodontitis (n = 25) | Subjects belonging to periodontal disease group showed a stronger gelatinolytic/collagenolytic activity (p < 0.001), although histatin 5 and Z-RGYR-MCA (synthetic substrate to test trypsin-like activities) proteolysis was not statistically different                                                                                                                                           | + (105)     |
| 2-DE-HPLC-ESI-MS/MS                               | Comparing proteomic profile of UWS between healthy subjects and others with GAP                                  | UWS from healthy subjects (n = 5) and from patients with GAP (n = 5)                                       | 11 differently expressed proteins (p < 0.05) in GAP:<br>serum albumin, Ig $\gamma$ 2 chain C region, Ig $\alpha$ 2 chain C region, vitamin D-binding protein, salivary $\alpha$ -amylase and zinc- $\alpha$ 2 glycoprotein overexpressed<br>lactotransferrin, elongation factor 2, 14-3-3 sigma, PLUNC2 precursor and CA 6 underexpressed                                                           | + (55)<br>- |

|                                                             |                                                                                                          |                                                                                                                            |                                                                                                                                                                                                                                                                                                                                                                                         |   |      |
|-------------------------------------------------------------|----------------------------------------------------------------------------------------------------------|----------------------------------------------------------------------------------------------------------------------------|-----------------------------------------------------------------------------------------------------------------------------------------------------------------------------------------------------------------------------------------------------------------------------------------------------------------------------------------------------------------------------------------|---|------|
| 2-DE-MALDI-TOF<br>2-DE-LC-MS/MS                             | Identifying differences in salivary proteome in active periodontitis after treatment                     | SWS from subjects with generalized periodontitis (n = 9)                                                                   | The level of 15 proteins changed significantly ( $p < 0.05$ ) after the treatment, remarkably the proteins belonging to S100 family were increased (S100 A8, A9 and A6)                                                                                                                                                                                                                 | + | (56) |
| 2-DE-HPLC-MS/MS<br>HPLC-MS/MS<br>Western Blotting           | Comparing GCF proteome with supragingival saliva proteome in periodontally healthy and diseased subjects | GCF and WS from healthy subjects (n = 5) and subjects with mild (n = 3), moderate (n = 3) and severe periodontitis (n = 5) | 327 proteins identified in GCF, 8 of which were distinctly expressed in GCF ( $p < 0.05$ ), including haptoglobin, superoxide dismutase 1, ALB protein, apolipoprotein A-I, and dermcidin<br>Subjects with severe periodontitis displayed higher expression of superoxide dismutase 1 ( $p < 0.0131$ ) and dermcidin ( $p < 0.0162$ ) than the healthy ones                             | + | (57) |
| Label-free Quantitative LC-MS <sup>E</sup> (nanoHPLC-Q-TOF) | Investigating GCF exudatome from healthy and periodontally diseased sites                                | GCF from healthy subjects (n = 5) and from GAP patients (n = 5)                                                            | 154 retrieved proteins (with $\geq 2$ unique peptide hits)<br>Periodontitis samples have shown different levels of some proteins: increased expression of microbial proteins, L-plastin and decreased expression of annexin-1, neutrophil defensins, cystatin B and IgG                                                                                                                 | + | (58) |
| 2-DE-MALDI-TOF/TOF<br>nanoLC-ESI-Q-TOF                      | Comparing protein profiles of UWS between healthy subjects and others with CP                            | UWS from healthy subjects (n = 10) and from CP patients (n = 10)                                                           | CP patients showed differently expressed proteins: increased expression of Ig heavy chain V-III region, serum albumin, hemoglobin, $\alpha$ -amylase and decreased expression of Cystatin-SN precursor (Cystatin-1)                                                                                                                                                                     | + | (59) |
| SDS-PAGE-nanoLC-Q-TOF                                       | Studying GCF proteome from healthy gingival crevice and from periodontal pocket                          | GCF from a healthy subject (n = 1) and two subjects with periodontitis (n = 2)                                             | 104 proteins detected present in both periodontally healthy and diseased sites, 64 proteins detected only in healthy sites and 63 proteins detected only in periodontitis sites ( $p < 0.05$ )<br>Some of the proteins were identified for the first time: ceruloplasmin, glycogen phosphorylase, glutathione S-transferase, phosphoglycerate mutase, proriasisin, S100A11 and resistin | - | (60) |



|                                                     |                                                                                                                                              |                                                                                                                                                      |                                                                                                                                                                                                                                                                                                                                                                                                                                                                                                                                                                                                                              |                |
|-----------------------------------------------------|----------------------------------------------------------------------------------------------------------------------------------------------|------------------------------------------------------------------------------------------------------------------------------------------------------|------------------------------------------------------------------------------------------------------------------------------------------------------------------------------------------------------------------------------------------------------------------------------------------------------------------------------------------------------------------------------------------------------------------------------------------------------------------------------------------------------------------------------------------------------------------------------------------------------------------------------|----------------|
| SELDI-TOF-MS<br>MALDI-TOF-MS/MS<br>Orbitrap MS      | Comparing salivary protein/peptide profile between obese patients with or without periodontitis                                              | SWS from healthy subjects (n = 19), from obese subjects with periodontitis (n = 13) and from obese subjects without periodontitis (n = 25)           | Obese patients with periodontitis showed lower mean intensity of $\alpha$ -defensin ( $36.47 \pm 19.84 \mu\text{A}$ ) than obese patients without periodontitis ( $43.44 \pm 30.34 \mu\text{A}$ ) ( $p < 0.05$ )<br>Besides obese patients showed higher mean intensity of $\alpha$ -defensin ( $40.99 \pm 30.34 \mu\text{A}$ ) than healthy controls ( $27.1 \pm 23.98 \mu\text{A}$ ) ( $p < 0.05$ )                                                                                                                                                                                                                        | (61)           |
| EIA                                                 | Studying the validity of 4 molecules (MIP-1 $\alpha$ , OPG, $\beta$ -CTX and ICTP) as biomarkers for alveolar bone remodeling in CP subjects | UWS from healthy subjects (n = 40) and from patients with generalized moderate to severe CP                                                          | MIP-1 $\alpha$ was found in higher levels in periodontitis patients than in healthy subjects (18-fold; $p < 0.0001$ )<br>The other molecular markers either fell below of detection limit or were not differently expressed with statistic significance                                                                                                                                                                                                                                                                                                                                                                      | +<br>(106)     |
| 2-DE-LC-ESI-MS/MS                                   | Searching for salivary proteins related to periodontitis in T2DM patients                                                                    | UWS from periodontally healthy T2DM patients (n = 10) and from periodontally diseased T2DM patients (n = 15)                                         | T2DM patients with periodontitis displayed significantly different levels of some proteins ( $p < 0.012$ ):<br>PLS-2, LEI, Ig J chain<br>pIgR, Arp 3, CA 6, IL-1Ra                                                                                                                                                                                                                                                                                                                                                                                                                                                           | +<br>-<br>(63) |
| <b>Peptidomics</b>                                  |                                                                                                                                              |                                                                                                                                                      |                                                                                                                                                                                                                                                                                                                                                                                                                                                                                                                                                                                                                              |                |
| WCX fractionation-<br>MALDI-TOF<br>nanoLC-ESI-MS/MS | Comparing peptide mass fingerprints of orthodontic patients with or without periodontitis                                                    | UWS from orthodontic patients without periodontitis (n = 8), orthodontic patients with periodontitis (n = 8) and patients with periodontitis (n = 8) | Orthodontic patients with periodontitis displayed significantly different levels ( $p < 0.05$ ) of certain peptides when comparing with orthodontic patients without periodontitis: an increased profile of ITIH4 Isoform 2 of inter- $\alpha$ -trypsin inhibitor heavy chain H4 precursor and SERPINA1 were found and a decreased profile of ACTB Actin, cytoplasmic 1; FGA Isoform1 of fibrinogen $\alpha$ chain precursor ( $m/z = 2621.9$ and $m/z = 3154.4$ ); 280-kDa protein; F2 Prothrombin precursor; WWCE Isoform 1 of vWF C and EGF domain-containing protein precursor; $m/z = 5435.2$ (unknown) were identified | +<br>-<br>(62) |

## Metabolomics

|     |                                                                                  |                                                                                                                              |                                                                                                                                                                                                                                                                                                    |             |
|-----|----------------------------------------------------------------------------------|------------------------------------------------------------------------------------------------------------------------------|----------------------------------------------------------------------------------------------------------------------------------------------------------------------------------------------------------------------------------------------------------------------------------------------------|-------------|
| NMR | Exploring saliva metabolic profile and finding an association with periodontitis | WS from healthy subjects (n = 22), patients with gingivitis (n = 3), with LCP (n = 4), with GCP (n = 21) or with GAP (n = 2) | Patients with GCP displayed a distinctive saliva metabolic profile when with healthy subjects (p < 0.05): increased profile of acetate, $\gamma$ -aminobutyrate, n-butyrate, succinate, trimethylamine, propionate, phenylalanine and valine and decreased profile of pyruvate and N-acetyl groups | + (98)<br>- |
|-----|----------------------------------------------------------------------------------|------------------------------------------------------------------------------------------------------------------------------|----------------------------------------------------------------------------------------------------------------------------------------------------------------------------------------------------------------------------------------------------------------------------------------------------|-------------|

**PCR:** Polymerase Chain Reaction; **IL:** interleukin; **IL-1RN:** interleukin-1 receptor antagonist gene; **TNFA:** tumor necrosis factor alpha gene; **RFLP:** Restriction Fragment Length Polymorphism; **AP:** Aggressive Periodontitis; **CP:** Chronic Periodontitis; **GWAS:** Genome wide-association study; **SNP:** single nucleotide polymorphism; **SHIP:** Study of Health In Pomerania; **SHIP-TREND:** (population-based cohort study); **TNF- $\alpha$ :** tumor necrosis factor alpha; **GNRH1:** gonadotropin-releasing hormone 1 gene; **PIK3R1:** phosphatidylinositol 3-kinase regulatory 1 gene; **DPP4:** dipeptidylpeptidase 4 gene; **FGL2:** fibrinogen-like 2 gene; **CALCR:** calcitonin receptor gene; **COX-2:** cyclooxygenase-2 gene; **GCP:** Generalized Chronic Periodontitis; **LAP:** Localized Aggressive Periodontitis; **TLR:** Toll-like receptor; **CD:** cluster of differentiation; **MMP:** matrix metalloproteinase; **NOS3:** endothelial nitric oxide synthase; **VNTR:** variable number of tandem repeats; **PD:** probing depth; **CAL:** clinical attachment level; **PCR-SSPs:** Polymerase Chain Reaction with Sequence-Specific Primers; **PECAM-1:** Platelet Endothelial Cell Adhesion Molecule-1; **GAP:** Generalized Aggressive Periodontitis; **GTL6D1:** glycosyltransferase 6 domain containing 1; **rRNA:** ribosomal RNA; **qRT-PCR:** Quantitative Real Time PCR; **mRNA:** messenger RNA; **IFN- $\alpha$ 1:** interferon- $\alpha$ 1; **cDNA:** complementary DNA; **PMN:** polymorphonuclear leukocytes; **NOD:** nucleotide-binding oligomerization domain; **RANTES:** Regulated upon Activation, Normal T-cell Expressed, and Secretes; **MCP-1:** Monocyte Chemotactic Protein-1; **UPLC:** Ultra Performance Liquid Chromatography; **MS:** Mass Spectrometry; **LC:** Liquid Chromatography; **SWS:** Stimulated Whole Saliva; **ESI:** Electrospray Ionization; **SDS-PAGE:** Sodium Dodecyl Sulphate-PolyAcrylamide Gel Electrophoresis; **GCF:** Gingival Crevicular Fluid; **WS:** Whole Saliva; **Z-RGYR-MCA:** histatin-derived synthetic analog benzyloxycarbonyl-Arg-Gly-Tyr-Arg-methyl cumaryl amide; **2-DE:** Two-dimensional gel Electrophoresis; **HPLC:** High Performance Liquid Chromatography; **UWS:** Unstimulated Whole Saliva; **Ig:** Immunoglobulin; **PLUNC2:** short Palate, Lung and Nasal epithelium Carcinoma-associated protein 2; **CA:** carbonic anhydrase; **MALDI-TOF:** Matrix-Assisted Laser Desorption Ionization-Time-Of-Flight; **Q-TOF:** Quadrupole-Time-Of-Flight; **SELDI:** Surface-Enhanced Laser Desorption/Ionization; **EIA:** Enzyme Immunosorbent Assays; **MIP-1 $\alpha$ :** Macrophage Inflammatory Protein-1 $\alpha$ ; **OPG:** Osteoprotegerin;  **$\beta$ -CTX:** C-terminal type-1 collagen telopeptide; **ICTP:** pyridinoline cross-linked carboxyterminal telopeptide of type I collagen; **T2DM:** Type 2 Diabetes Mellitus; **PLS-2:** Plastin-2; **LEI:** Leukocyte Elastase Inhibitor; **pIgR:** polymeric Immunoglobulin Receptor; **Arp:** Actin-related protein; **IL-1Ra:** interleukin-1 receptor antagonist; **WCX:** Weak Cation exchange; **vWF:** von Willebrand Factor; **NMR:** Nuclear Magnetic Resonance; **LCP:** Localized Chronic Periodontitis
